# Supplementary material
Source: Springer Nature journal article supplement (https://www.springermedizin.de/resource/supplementary/13075_2012_4385_MOESM8_ESM.pdf/10110298)
Supplement: MOESM8 [file 10110298]

## Identification of progressors by C1M

Table 4: Odds ratios for JSN and mTSS at 52 weeks, when combining high and low level of serum C1M and CRP in the PBO group. The groups were categorized according to high or low baseline C1M and high or low baseline CRP based on the respective median value.

| <b>C1M/CRP</b> |        | <b>High/any vs.<br/>Low/any</b> | <b>High/High vs.<br/>Low/Low</b> | <b>High/Low vs.<br/>Low/Low</b> | <b>Low/High vs.<br/>Low/Low</b> |
|----------------|--------|---------------------------------|----------------------------------|---------------------------------|---------------------------------|
| <b>JSN</b>     | OR     | 3.15                            | 3.61                             | 2.37                            | 1.95                            |
|                | 95% CI | 1.50-6.58                       | 1.62-8.01                        | 0.59-9.44                       | 0.39-9.77                       |
|                | P      | 0.0023                          | 0.0018                           | 0.22                            | 0.42                            |
| <b>mTSS</b>    | OR     | 2.94                            | 3.55                             | 1.79                            | 1.94                            |
|                | 95% CI | 1.71-5.05                       | 1.97-6.41                        | 0.60-5.33                       | 0.58-6.49                       |
|                | P      | 0.0001                          | <0.0001                          | 0.30                            | 0.28                            |

The high and low levels of the biomarkers were based on the median value of all patients at baseline.
